# Supplementary material for: Factors driving CT utilisation in tertiary hospitals: a decomposition analysis using linked administrative data in Western Australia
Source: PubMed Central journal article supplement — BMJ Open. 2021 Nov 11;11(11):e052954. doi: 10.1136/bmjopen-2021-052954 (PMC8587703; doi:10.1136/bmjopen-2021-052954), 2021-11-11
Supplement: bmjopen-2021-052954supp001.pdf [file bmjopen-2021-052954supp001.pdf]

Table 1A. Decomposition of the difference in the use of CT of all tertiary admissions between two periods

|                                        | Number of CT per admission | 95% CI                 |            |
|----------------------------------------|----------------------------|------------------------|------------|
| <b>The use of CT</b>                   |                            |                        |            |
| The past period                        | 0.131                      | 0.129; 0.132           |            |
| The recent period                      | 0.243                      | 0.241; 0.245           |            |
| <b>Difference</b>                      | <b>0.112</b>               | <b>0.110; 0.114</b>    |            |
| <b>Decomposition output</b>            |                            |                        |            |
|                                        | Coefficient                | 95% CI                 | Percentage |
| Endowment component                    | 0.069***                   | 0.068; 0.070           | 62.7       |
| Effect component                       | 0.043***                   | 0.041; 0.045           | 37.3       |
| <b>1. Specific endowment component</b> |                            |                        |            |
| Sex                                    | -0.00039***                | -0.00043; -0.00036     | -0.4       |
| Indigenous                             | 0.000074***                | 0.000066; 0.000081     | 0.1        |
| Age groups                             |                            |                        |            |
| 18-44 years                            | -0.00025***                | -0.00027; -0.00023     | -0.2       |
| 45-64 years                            | 0.00010***                 | 0.000089; 0.00011      | 0.1        |
| 65-74 years                            | -0.00025***                | -0.00029; -0.00021     | -0.2       |
| 75 + years                             | -0.0000039**               | -0.0000066; -0.0000012 | -0.004     |
| SEIFA                                  |                            |                        |            |
| Least disadvantage                     | 0.0000081                  | -0.0000085; 0.000025   | 0.01       |
| Less disadvantage                      | -0.000020                  | -0.000053; 0.000013    | -0.02      |
| Moderate disadvantage                  | 0.000056                   | -0.000060; 0.00017     | 0.1        |
| High disadvantage                      | 0.000061                   | -0.000015; 0.00014     | 0.1        |
| Highest disadvantage                   | -0.00010                   | -0.00029; 0.000086     | -0.1       |
| Unknown                                | -0.000028                  | -0.000075; 0.000018    | -0.2       |
| ARIA                                   |                            |                        |            |
| Major cities                           | -0.00012**                 | -0.00020; -0.000034    | -0.1       |
| Inner regional areas                   | -0.00029*                  | -0.00052; -0.000055    | -0.3       |
| Outer regional areas                   | 0.000076**                 | 0.000027; 0.00013      | 0.1        |
| Remote                                 | 0.000014                   | -0.0000095; 0.000037   | 0.01       |
| Very Remote                            | 0.000065**                 | 0.000028; 0.00010      | 0.1        |
| Unknown                                | -0.00015*                  | -0.00030; -0.0000086   | -0.1       |
| Major principal diagnoses              |                            |                        |            |
| Mental conditions                      | -0.00022***                | -0.00028; -0.00017     | -0.2       |
| Circulatory conditions                 | 0.00051***                 | 0.00048; 0.00054       | 0.5        |
| Digestive conditions                   | 0.0010***                  | 0.00096; 0.0011        | 0.9        |
| Endocrine conditions                   | -0.00013***                | -0.00016; -0.00011     | -0.1       |
| Musculoskeletal                        | 0.0000029                  | -0.0000064; 0.000012   | 0.003      |
| Respiratory                            | -0.000054***               | -0.000080; -0.000028   | -0.05      |
| Injuries                               | 0.0052***                  | 0.0051; 0.0053         | 4.7        |
| Cancer                                 | 0.000084***                | 0.000082; 0.000086     | 0.1        |
| Number of morbidities                  |                            |                        |            |
| 0-1                                    | -0.0021***                 | -0.0022; -0.0021       | -1.9       |
| 2-5                                    | 0.0025***                  | 0.0024; 0.0026         | 2.3        |
| 6 or more                              | 0.0067***                  | 0.0065; 0.0068         | 6.1        |
| Private funding                        | 0.0032***                  | 0.0029; 0.0035         | 2.9        |

|                                      |             |                     |      |
|--------------------------------------|-------------|---------------------|------|
| Unplanned admission                  | 0.055***    | 0.055; 0.056        | 50.0 |
| Transferred from secondary hospitals | -0.00073*** | -0.00081; -0.00065  | -0.7 |
| Had surgical procedures in hospital  | -0.0010***  | -0.0012; -0.00092   | -0.9 |
| <b>2. Specific effect component</b>  |             |                     |      |
| Sex                                  | -0.00043    | -0.0015; 0.00059    | -0.4 |
| Indigenous                           | 0.00059***  | 0.00026; 0.00091    | 0.5  |
| Age groups                           |             |                     |      |
| 18-44 years                          | -0.0031***  | -0.0037; -0.0025    | -2.8 |
| 45-64 years                          | -0.00023    | -0.00075; 0.00029   | -0.2 |
| 65-74 years                          | 0.00050*    | 0.00011; 0.00089    | 0.5  |
| 75 + years                           | 0.0021***   | 0.0017; 0.0025      | 1.9  |
| SEIFA                                |             |                     |      |
| Least disadvantage                   | 0.00080     | -0.00050; 0.0021    | 0.7  |
| Less disadvantage                    | 0.00054     | -0.00037; 0.0014    | 0.5  |
| Moderate disadvantage                | 0.00060     | -0.00033; 0.0015    | 0.5  |
| High disadvantage                    | 0.00044     | -0.00046; 0.0013    | 0.4  |
| Highest disadvantage                 | 0.00055     | -0.00018; 0.0013    | 0.5  |
| Unknown                              | -0.000070   | -0.00017; 0.000031  | -0.1 |
| ARIA                                 |             |                     |      |
| Major cities                         | 0.0060*     | 0.00086; 0.011      | 5.5  |
| Inner regional areas                 | 0.00014     | -0.00029; 0.00056   | 0.1  |
| Outer regional areas                 | -0.00013    | -0.00038; 0.00011   | -0.1 |
| Remote                               | -0.00050*** | -0.00065; -0.00035  | -0.5 |
| Very Remote                          | -0.00032*** | -0.00044; -0.00021  | -0.3 |
| Unknown                              | 0.000092**  | 0.000037; 0.00015   | 0.1  |
| Major principal diagnoses            |             |                     |      |
| Mental conditions                    | -0.00062*** | -0.00077; -0.00048  | -0.6 |
| Circulatory conditions               | -0.0011***  | -0.0014; -0.00087   | -1.0 |
| Digestive conditions                 | -0.0011***  | -0.0014; -0.00087   | -1.0 |
| Endocrine conditions                 | 0.000037    | -0.00012; 0.00019   | -0.1 |
| Musculoskeletal                      | -0.0015***  | -0.0018; -0.0012    | -1.4 |
| Respiratory                          | -0.00093*** | -0.0011; -0.00076   | -0.8 |
| Injuries                             | 0.00015     | -0.000048; 0.00034  | 0.1  |
| Cancer                               | -0.0022***  | -0.0024; -0.0020    | -2.0 |
| Number of morbidities                |             |                     |      |
| 0-1                                  | 0.0019***   | 0.0015; 0.0024      | 1.7  |
| 2-5                                  | 0.0035***   | 0.0024; 0.0045      | 3.2  |
| 6 or more                            | -0.00089*** | -0.0010; -0.00078   | -0.8 |
| Private funding                      | -0.00037*** | -0.00057; -0.00017  | -0.3 |
| Unplanned admission                  | -0.0054***  | -0.0064; -0.0044    | -4.9 |
| Transferred from secondary hospitals | -0.00089*** | -0.0010; -0.00075   | -0.8 |
| Had surgical procedures in hospital  | -0.00021**  | -0.00035; -0.000062 | -0.2 |
| Constant                             | 0.046***    | 0.041; 0.051        | 41.8 |

Note: \*\*\* if  $p$ -value<0.001; \*\* if  $p$ -value<0.01; \* if  $p$ -value<0.05

Table 1B. Decomposition of the difference in the use of CT for unplanned admissions between two periods

|                                        | Number of CT per admission | 95% CI                  |            |
|----------------------------------------|----------------------------|-------------------------|------------|
| <b>The use of CT</b>                   |                            |                         |            |
| The past period                        | 0.301                      | 0.298; 0.304            |            |
| The recent period                      | 0.418                      | 0.414; 0.420            |            |
| <b>Difference</b>                      | <b>0.117</b>               | <b>0.112; 0.120</b>     |            |
| <b>Decomposition of the difference</b> | Coefficient                | 95% CI                  | Percentage |
| Endowment component                    | 0.020***                   | 0.019; 0.021            | 17.1       |
| Effect component                       | 0.096***                   | 0.092; 0.10             | 82.1       |
| <b>Specific endowment</b>              |                            |                         |            |
| Sex                                    | 0.00096***                 | (0.00087; 0.0011)       | 0.8        |
| Indigenous                             | -0.0024***                 | (-0.0026; -0.0021)      | -2.0       |
| <b>Age groups</b>                      |                            |                         |            |
| 18-44 years                            | 0.0017***                  | (0.0016; 0.0019)        | 1.4        |
| 45-64 years                            | 0.0011***                  | (0.00099; 0.0012)       | 0.9        |
| 65-74 years                            | -0.00011***                | (-0.00012; -0.000092)   | -0.1       |
| 75 + years                             | 0.0000087***               | (0.0000039; 0.000013)   | 0.01       |
| <b>SEIFA</b>                           |                            |                         |            |
| Least disadvantage                     | 0.00023                    | (-0.000026; 0.00048)    | 0.2        |
| Less disadvantage                      | 0.000092                   | (-0.0000057; 0.00019)   | 0.1        |
| Moderate disadvantage                  | 0.00018                    | (-0.00021; 0.00057)     | 0.2        |
| High disadvantage                      | -0.000023                  | (-0.000097; 0.000050)   | -0.02      |
| Highest disadvantage                   | -0.00036                   | (-0.0011; 0.00040)      | -0.3       |
| Unknown                                | -0.00021                   | (-0.00053; 0.00011)     | -0.2       |
| <b>ARIA</b>                            |                            |                         |            |
| Major cities                           | -0.00043                   | (-0.0012; 0.00037)      | -0.4       |
| Inner regional areas                   | -0.00073                   | (-0.0019; 0.00040)      | -0.6       |
| Outer regional areas                   | -0.000031**                | (-0.000053; -0.0000085) | -0.03      |
| Remote                                 | 0.00000088                 | (-0.0000017; 0.0000035) | 0.001      |
| Very Remote                            | 0.00014***                 | (0.000071; 0.00021)     | 0.1        |
| Unknown                                | -0.00068                   | (-0.0013; -0.00048)     | -0.6       |
| <b>Major principal diagnoses</b>       |                            |                         |            |
| Mental conditions                      | 0.00076***                 | (0.00065; 0.00087)      | 0.6        |
| Circulatory conditions                 | -0.0039***                 | (-0.0043; -0.0036)      | -3.3       |
| Digestive conditions                   | 0.00063***                 | (0.00058; 0.00069)      | 0.5        |
| Endocrine conditions                   | 0.00088***                 | (0.00073; 0.0010)       | 0.7        |
| Musculoskeletal                        | -0.00062***                | (-0.00077; -0.00047)    | -0.5       |
| Respiratory                            | 0.0014***                  | (0.0011; 0.0016)        | 1.2        |
| Injuries                               | 0.0034***                  | (0.0032; 0.0035)        | 2.8        |
| Cancer                                 | -0.0042***                 | (-0.0044; -0.0040)      | -3.5       |
| <b>Number of morbidities</b>           |                            |                         |            |
| 0-1                                    | 0.0020***                  | (0.0019; 0.0021)        | 1.7        |
| 2-5                                    | 0.0018***                  | (0.0017; 0.0019)        | 1.5        |

|                                      |             |                     |       |
|--------------------------------------|-------------|---------------------|-------|
| 6 or more                            | 0.010***    | (0.010; 0.011)      | 8.3   |
| Private funding                      | 0.0094***   | (0.0084; 0.010)     | 7.8   |
| Transferred from secondary hospitals | 0.00049***  | (0.00044; 0.00054)  | 0.4   |
| Admission with surgical procedures   | -0.0019***  | (-0.0022; -0.0017)  | -1.6  |
| <b>Specific effect component</b>     |             |                     |       |
| Sex                                  | 0.0035      | (-0.00021; 0.0072)  | 2.9   |
| Indigenous                           | 0.00050     | (-0.00051; 0.0015)  | 0.4   |
| <b>Age groups</b>                    |             |                     |       |
| 18-44 years                          | -0.013***   | (-0.015; -0.010)    | -10.8 |
| 45-64 years                          | -0.0011     | (-0.0027; 0.00042)  | -0.9  |
| 65-74 years                          | 0.0015**    | (0.00046; 0.0026)   | 1.3   |
| 75 + years                           | 0.0083***   | (0.0066; 0.0100)    | 6.9   |
| <b>SEIFA</b>                         |             |                     |       |
| Least disadvantage                   | 0.0024      | (-0.0023; 0.0071)   | 2     |
| Less disadvantage                    | 0.0023      | (-0.00092; 0.0055)  | 1.9   |
| Moderate disadvantage                | 0.0018      | (-0.0015; 0.0051)   | 1.5   |
| High disadvantage                    | 0.0015      | (-0.0017; 0.0047)   | 1.3   |
| Highest disadvantage                 | 0.0020      | (-0.00063; 0.0046)  | 1.7   |
| Unknown                              | -0.00034    | (-0.00086; 0.00017) | -0.3  |
| <b>ARIA</b>                          |             |                     |       |
| Major cities                         | 0.0024      | (-0.016; 0.020)     | 2     |
| Inner regional areas                 | 0.00030     | (-0.0013; 0.0019)   | 0.3   |
| Outer regional areas                 | 0.000092    | (-0.00081; 0.00100) | 0.1   |
| Remote                               | -0.0016***  | (-0.0021; -0.0010)  | -1.3  |
| Very Remote                          | -0.00099*** | (-0.0014; -0.00056) | -0.8  |
| Unknown                              | 0.00058**   | (0.00019; 0.00097)  | 0.5   |
| <b>Major principal diagnoses</b>     |             |                     |       |
| Mental conditions                    | -0.0031***  | (-0.0043; -0.0019)  | -2.6  |
| Circulatory conditions               | -0.0045***  | (-0.0061; -0.0029)  | -3.8  |
| Digestive conditions                 | -0.0034***  | (-0.0047; -0.0022)  | -2.8  |
| Endocrine conditions                 | 0.0010***   | (0.00033; 0.0017)   | 0.8   |
| Musculoskeletal                      | -0.0019***  | (-0.0026; -0.0012)  | -1.6  |
| Respiratory                          | -0.0032***  | (-0.0045; -0.0020)  | -2.7  |
| Injuries                             | 0.0037***   | (0.0021; 0.0053)    | 3.1   |
| Cancer                               | -0.0044***  | (-0.0050; -0.0038)  | -3.7  |
| <b>Number of morbidities</b>         |             |                     |       |
| 0-1                                  | 0.0079***   | (0.0064; 0.0093)    | 6.6   |
| 2-5                                  | 0.0024      | (-0.00097; 0.0057)  | 2     |
| 6 or more                            | -0.0060***  | (-0.0068; -0.0052)  | -5    |
| Private funding sources              | -0.00020    | (-0.00099; 0.00058) | -0.2  |
| Transferred from secondary hospitals | -0.0090     | (-0.010; -0.0078)   | -7.5  |
| Admission with surgical procedures   | -0.0015**   | (-0.0024; -0.00050) | -1.3  |
| Constant                             | 0.11***     | (0.091; 0.12)       | 91.7  |

Note: \*\*\* if  $p$ -value<0.001; \*\* if  $p$ -value<0.01; \* if  $p$ -value<0.05
